# Supplementary material for: Defense Response to Hemileia vastatrix in Susceptible Grafts onto Resistant Rootstock of Coffea arabica L.
Source: MDPI journal article supplement (doi:10.3390/agronomy11081621), 2021-08-16
Supplement: s1 [file s1]

**Table S4.** Analysis of the incidence and severity (percentage of damaged leaf area and number of sporulated pustules) of rust infection at 236 days after inoculation (dai).

|                                           | p        | Garnica |      | Garnica/Oro Azteca |      | Oro Azteca |      | Oro Azteca/Garnica |      |
|-------------------------------------------|----------|---------|------|--------------------|------|------------|------|--------------------|------|
|                                           |          | $\mu$   | S.E. | $\mu$              | S.E. | $\mu$      | S.E. | $\mu$              | S.E. |
| <b>Incidence Index</b>                    | < 0.0001 | 29.40a  | 3.48 | 13.19b             | 2.72 | 5.73c      | 1.55 | 11.32b             | 3.01 |
| <b>*Damage area leaf (%)</b>              | < 0.0001 | 4.85a   | 0.47 | 3.52b              | 0.69 | 1.73c      | 0.53 | 3.99b              | 1.33 |
| <b>Number of pustule with sporulation</b> | < 0.0001 | 4.76a   | 0.41 | 3.35b              | 0.68 | 1.21c      | 0.92 | 2.46bc             | 0.77 |

\*To perform the analysis of variance, the percentage values were transformed with the arcsine function; letters indicate significant differences in multiple comparisons means ( $\alpha = 0.05$ ); modified from Couttolenc-Brenis et al. [87].
