# Supplementary material for: Defense Response to Hemileia vastatrix in Susceptible Grafts onto Resistant Rootstock of Coffea arabica L.
Source: MDPI journal article supplement (doi:10.3390/agronomy11081621), 2021-08-16
Supplement: s1 [file s1]

**Table S1.** Significance of the effect of time since infection on the number of fungal structures in each experimental condition (Kruskal-Wallis test).

| <b>Condition</b>          | <b>Anchor</b> | <b>HMC</b> | <b>Haustorium</b> |
|---------------------------|---------------|------------|-------------------|
| <b>Garnica</b>            | p < 0.0001    | p < 0.0001 | p < 0.0001        |
| <b>Garnica/Oro Azteca</b> | p = 0.2056    | p < 0.0001 | p < 0.0001        |
| <b>Oro Azteca</b>         | p = 0.3631    | p < 0.0001 | p = 0.0004        |
| <b>Oro Azteca/Garnica</b> | p = 0.1946    | p = 0.0006 | p < 0.0001        |
