# Supplementary material for: Defense Response to Hemileia vastatrix in Susceptible Grafts onto Resistant Rootstock of Coffea arabica L.
Source: MDPI journal article supplement (doi:10.3390/agronomy11081621), 2021-08-16
Supplement: s1 [file s1]

**Table S3.** Frequency of CLR symptomatic plants at 30, 60, 100, 130, 165, 208 and 236 days after inoculation (dai).

| Condition                 | Days after inoculation |      |      |      |      |      |      |
|---------------------------|------------------------|------|------|------|------|------|------|
|                           | 30                     | 60   | 100  | 130  | 165  | 208  | 236  |
| <b>Garnica</b>            | 0.29                   | 0.75 | 0.79 | 0.91 | 0.91 | 0.91 | 0.95 |
| <b>Garnica/Oro Azteca</b> | 0.16                   | 0.33 | 0.41 | 0.41 | 0.41 | 0.45 | 0.62 |
| <b>Oro Azteca</b>         | 0                      | 0    | 0    | 0    | 0.08 | 0.25 | 0.45 |
| <b>Oro Azteca/Garnica</b> | 0.04                   | 0.20 | 0.25 | 0.41 | 0.45 | 0.45 | 0.50 |

The frequency was calculated as the quotient of the number of plants with at least one leaf whit damage divided by the total of plants (n=24).
