# Supplementary material for: Defense Response to Hemileia vastatrix in Susceptible Grafts onto Resistant Rootstock of Coffea arabica L.
Source: MDPI journal article supplement (doi:10.3390/agronomy11081621), 2021-08-16
Supplement: s1 [file s1]

Archive with 6 entries (6 files):
- Fig_S1.jpg
- Fig_S2.jpg
- Table_S1.pdf
- Table_S2.pdf
- Table_S3.pdf
- Table_S4.pdf
