# Supplementary material for: Defense Response to Hemileia vastatrix in Susceptible Grafts onto Resistant Rootstock of Coffea arabica L.
Source: MDPI journal article supplement (doi:10.3390/agronomy11081621), 2021-08-16
Supplement: s1 [file s1 › Table_S2.pdf]

**Table S2.** Comparison of average ranges obtained by the Kruskal-Wallis variance test of the fungal structure counts at each time for the four experimental conditions. Different letters indicate significant differences ( $\alpha=0.05$ ).

| Condition                  | Anchor  |          |         |         | HMC     |         |         |         | Haustorium |         |          |         |
|----------------------------|---------|----------|---------|---------|---------|---------|---------|---------|------------|---------|----------|---------|
|                            | 12      | 24       | 48      | 72      | 12      | 24      | 48      | 72      | 12         | 24      | 48       | 72 hai  |
| <b>Garnica</b>             | 437.70b | 399.94ab | 372.78a | 429.59b | 399.26a | 395.00a | 395.00a | 450.32b | 512.00c    | 387.00b | 334.69a  | 411.15b |
| <b>Garnica/ Oro Azteca</b> | 394.38a | 398.35a  | 409.09a | 406.83a | 397.50a | 397.50a | 397.50a | 416.32a | 484.20c    | 370.94a | 419.85b  | 339.27a |
| <b>Oro Azteca</b>          | 401.87a | 407.90a  | 400.08a | 412.76a | 402.00a | 402.00a | 402.00a | 416.77a | 431.20b    | 413.70b | 406.86ab | 365.16a |
| <b>Oro Azteca/Garnica</b>  | 377.27a | 389.67a  | 395.72a | 387.66a | 383.50a | 385.52a | 383.50a | 397.61a | 412.08b    | 381.23b | 421.50b  | 334.41a |

The estimation of the differences between each sampling time was carried out by comparing the ranges generated in the non-parametric analysis of variance using the Kruskal-Wallis test [86]; (HMC) haustorial mother cell, (hai) hours after infection.
