# Supplementary figures and images for: Defense Response to Hemileia vastatrix in Susceptible Grafts onto Resistant Rootstock of Coffea arabica L.
Source: MDPI journal article supplement (doi:10.3390/agronomy11081621), 2021-08-16

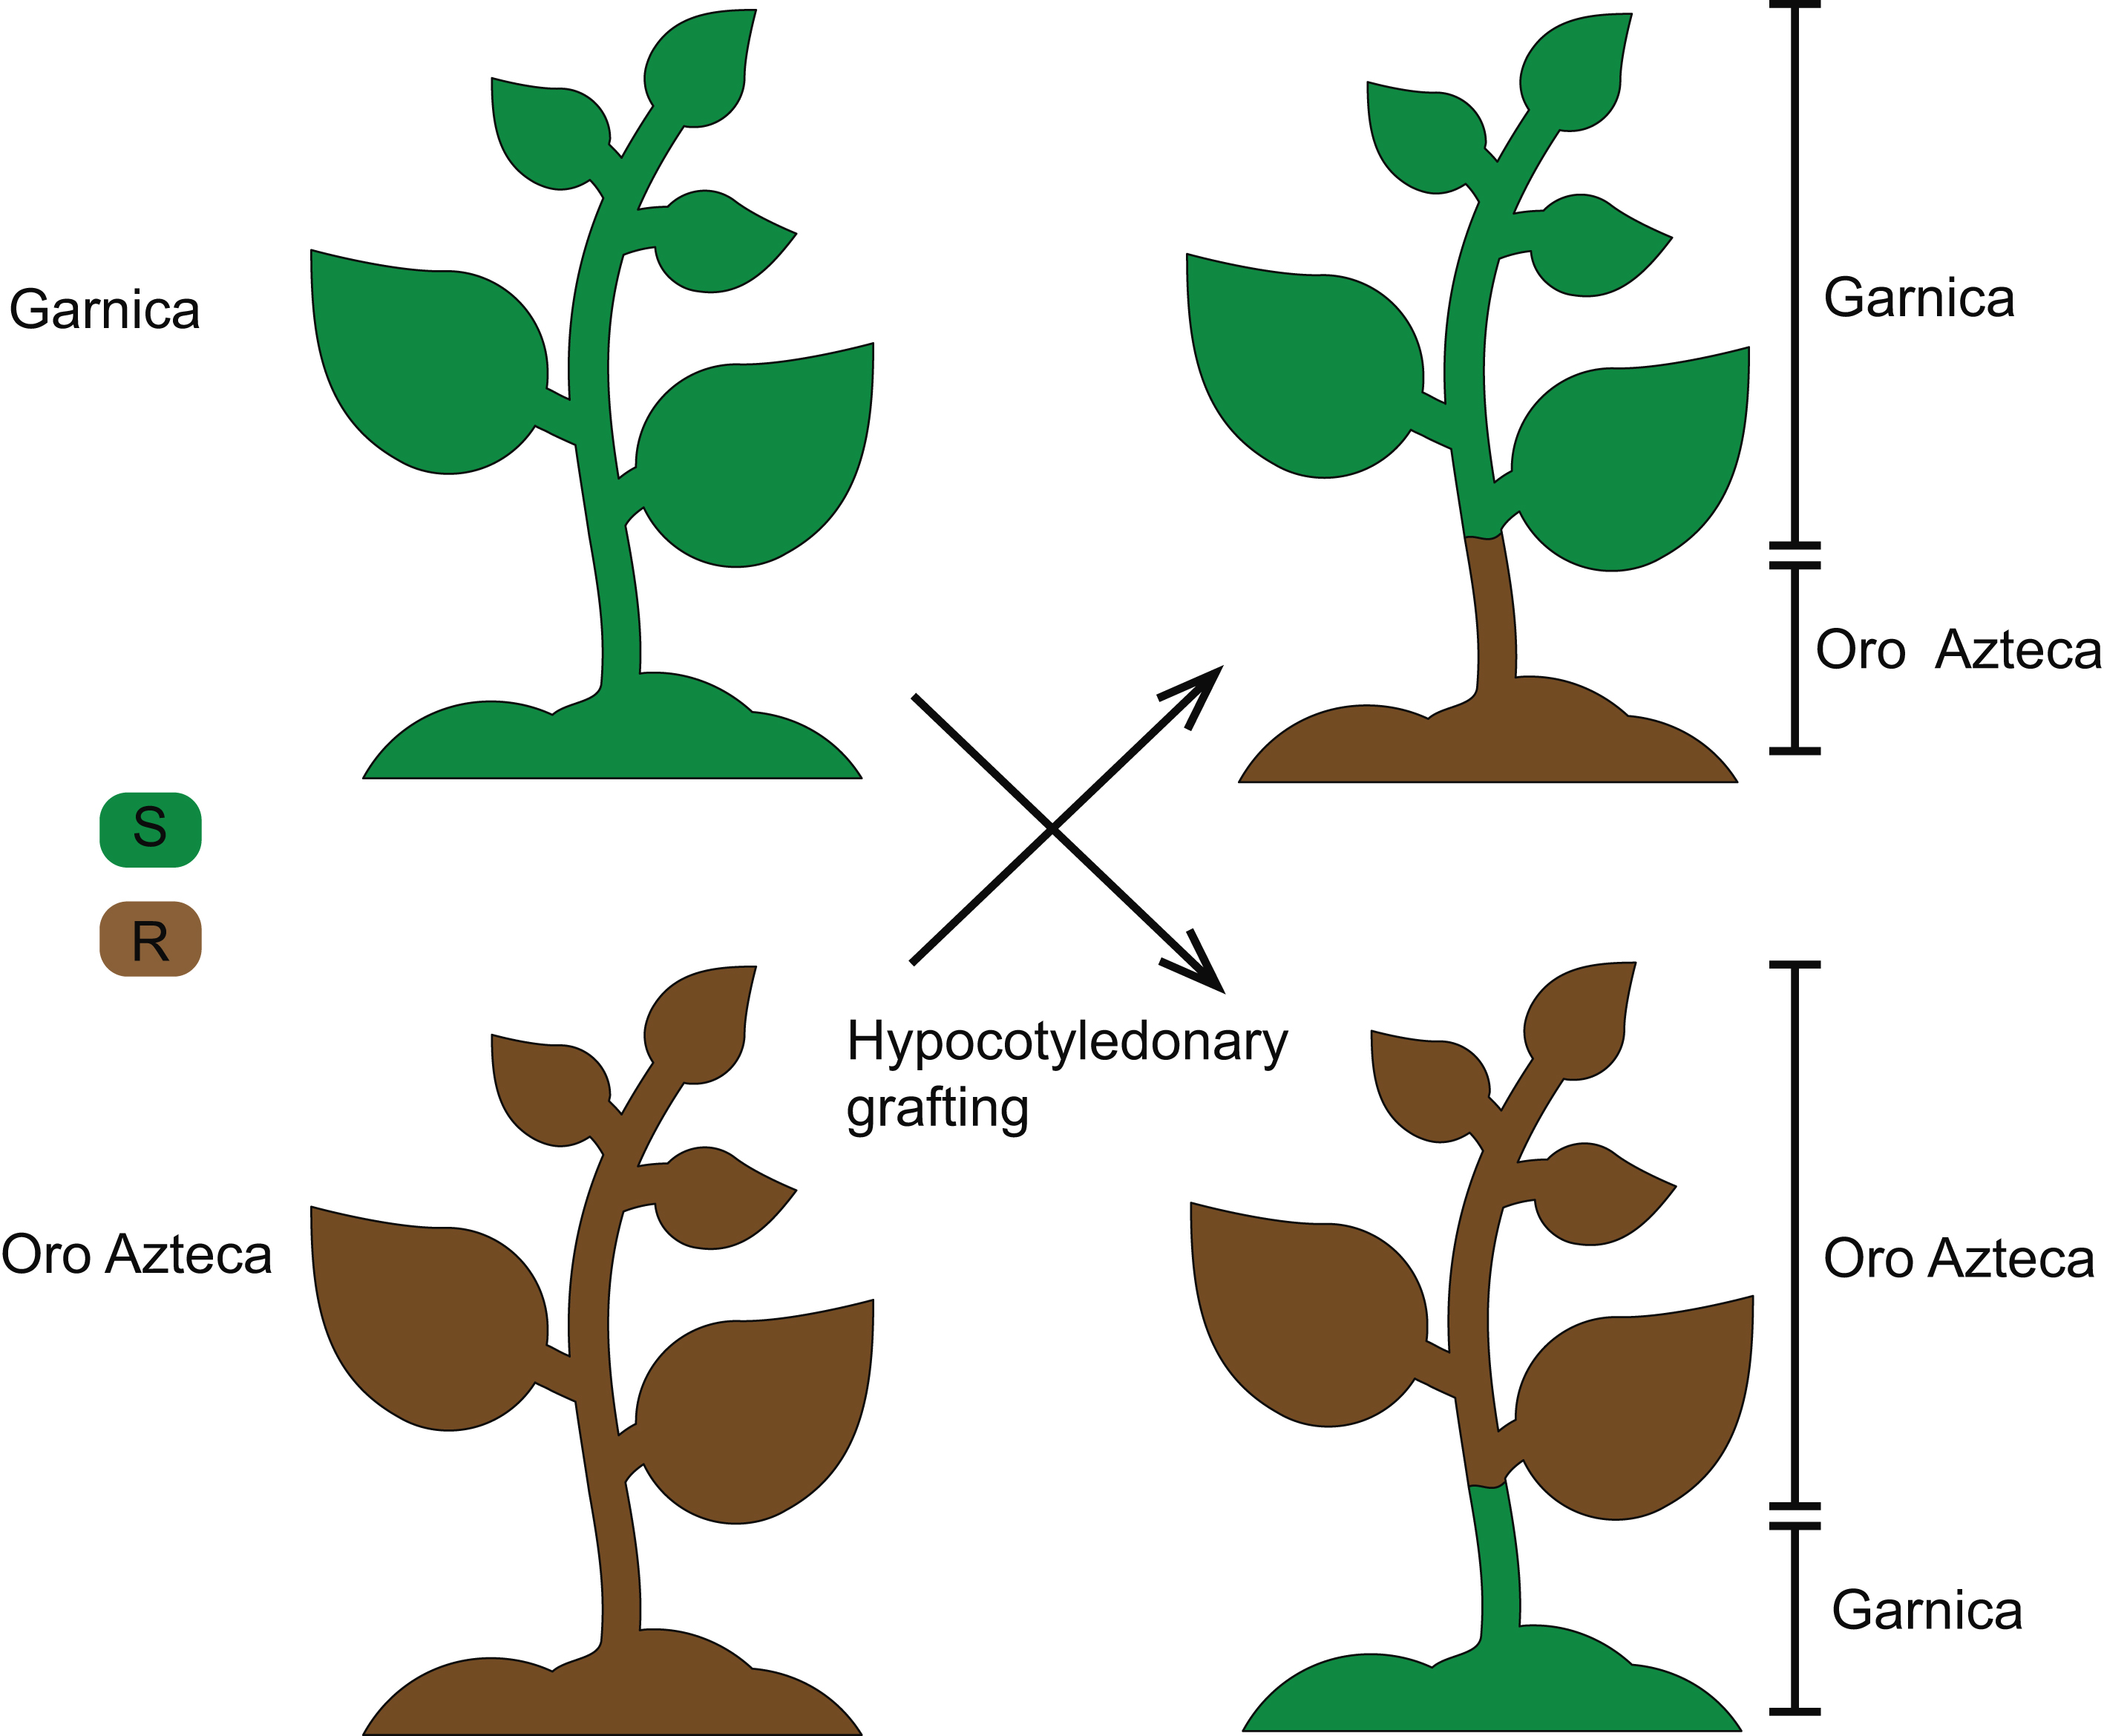

Supplement: s1 [file s1 › Fig_S1.jpg]

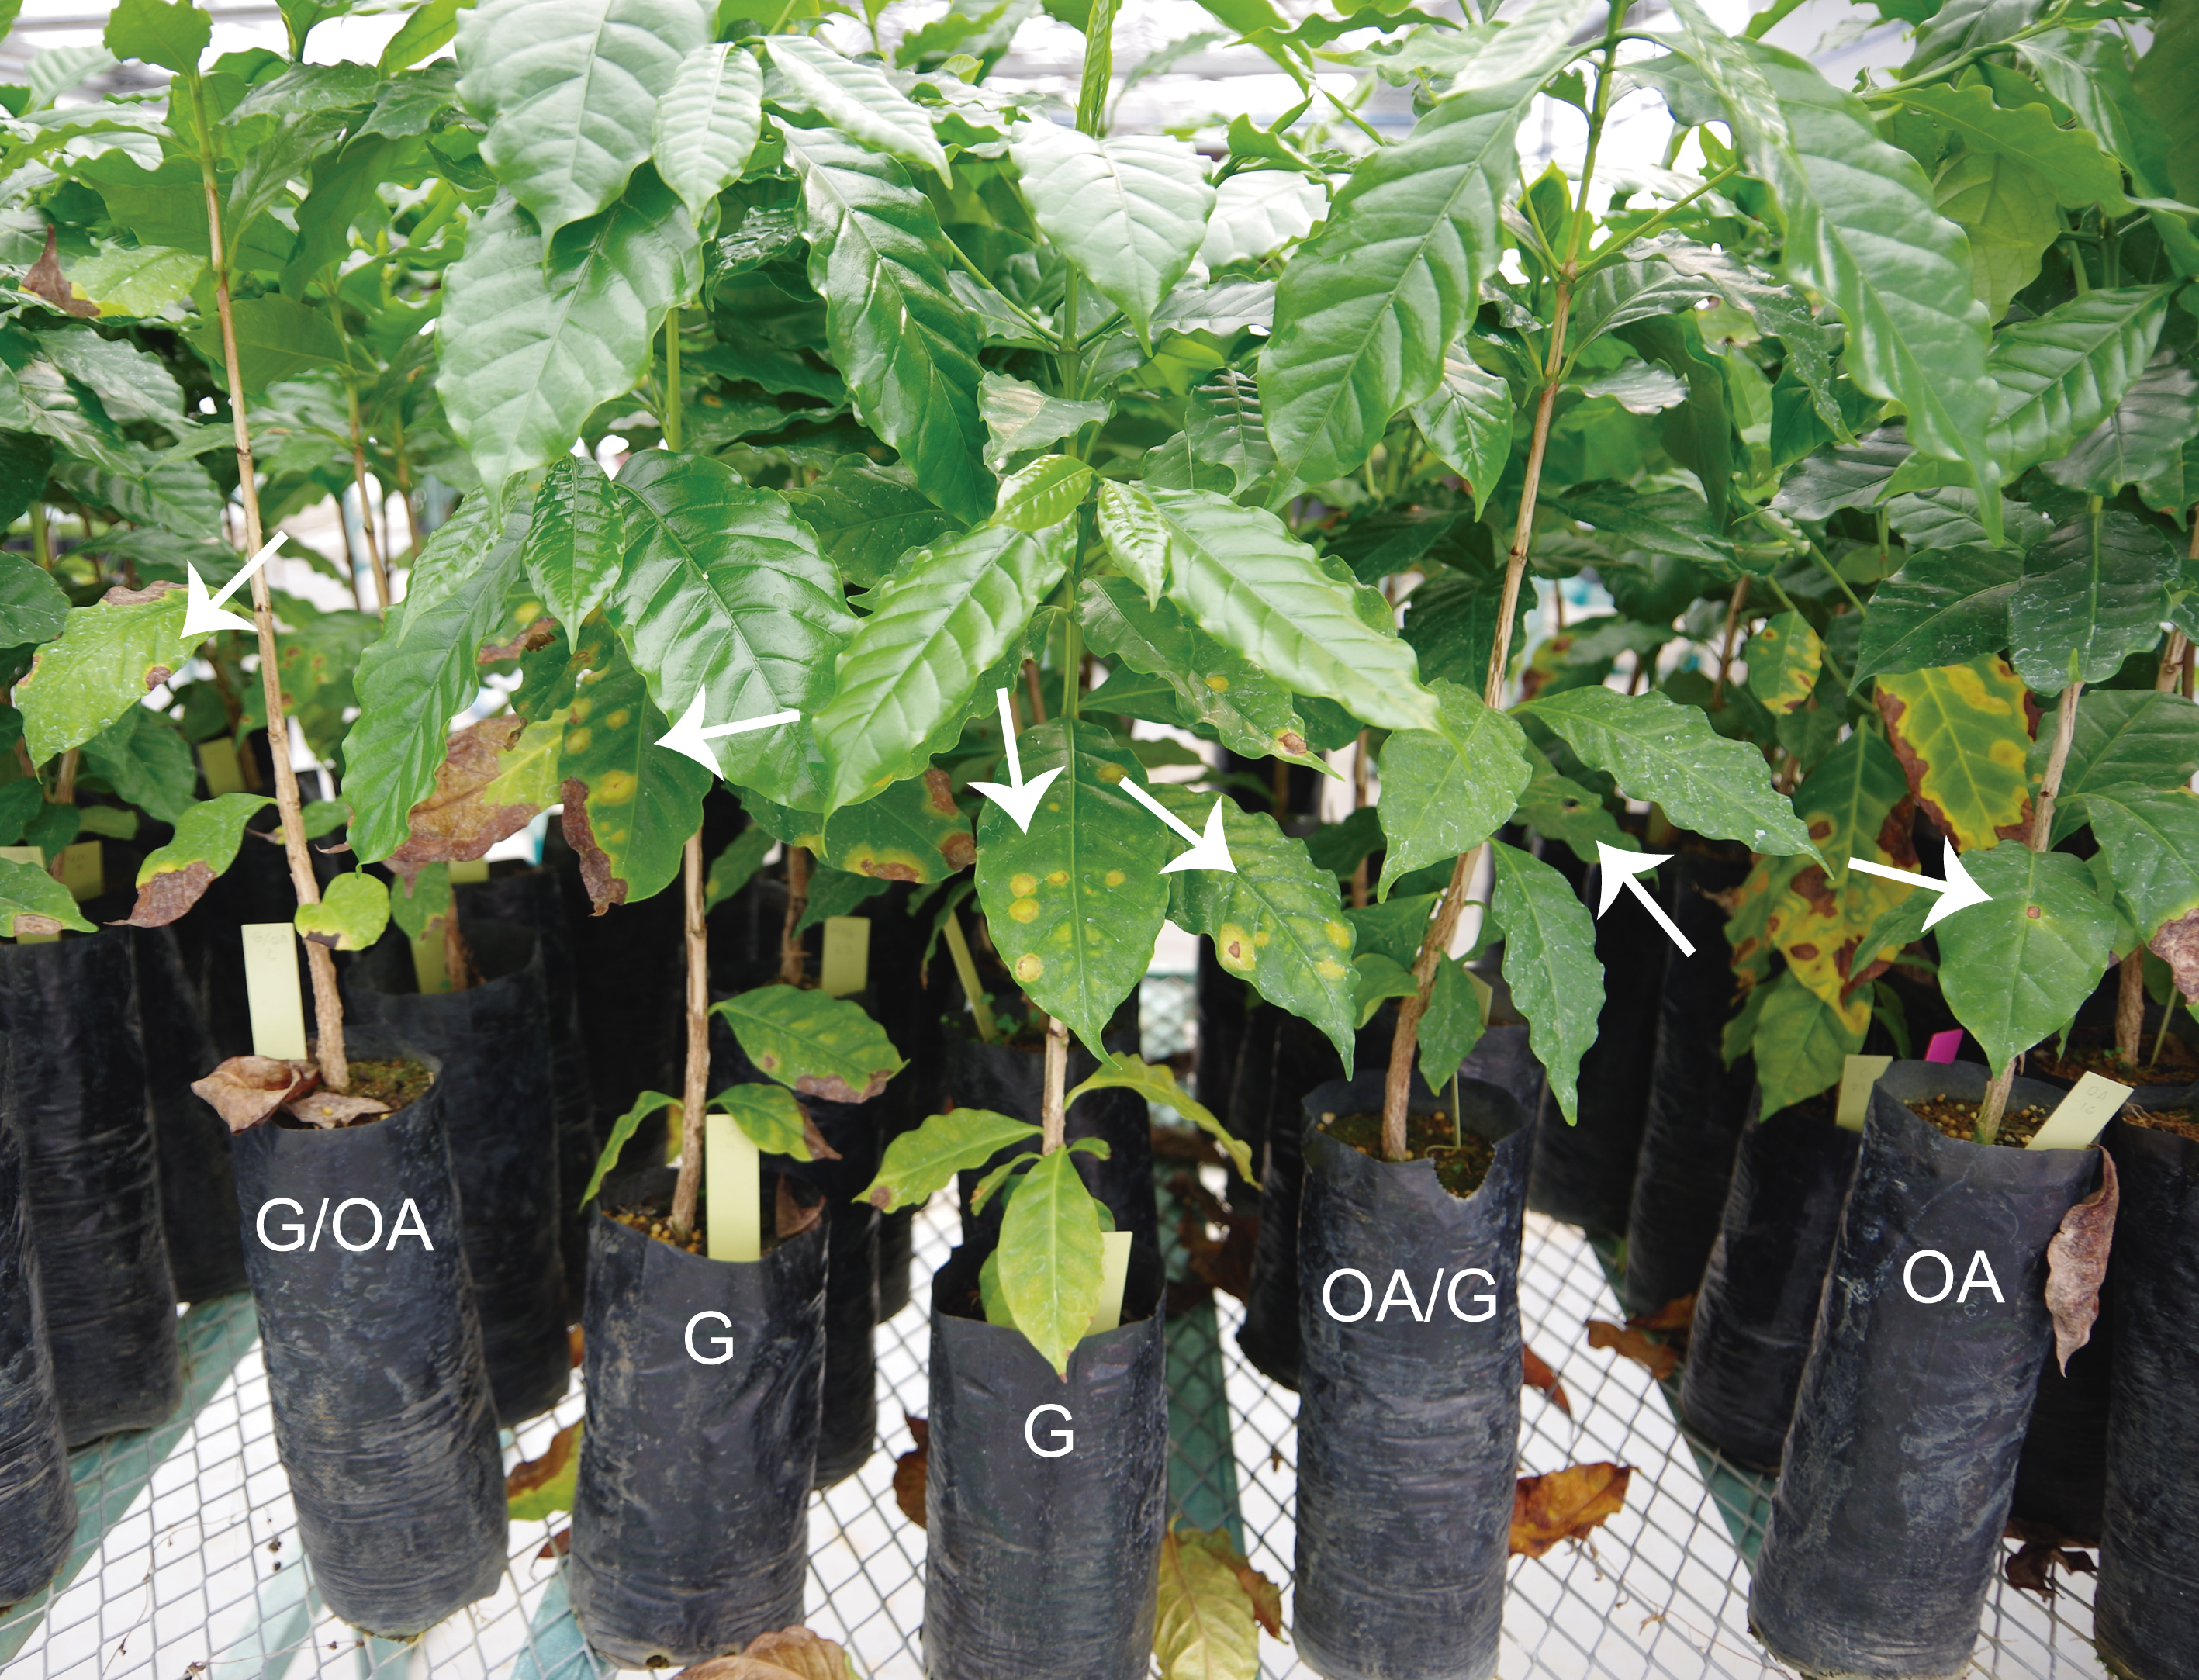

Supplement: s1 [file s1 › Fig_S2.jpg]
